1           **Regenerating axons and blood vessels in tissue engineered scaffolds have**  
2           **defined spatial relationships after spinal cord injury.**

3  
4   Running title: Spatial relationships of axons and vessels

5  
6   Ahad M. Siddiqui, PhD<sup>1\*</sup>; Priska Summer, M.D.<sup>2\*</sup>; David Oswald, M.D.<sup>2\*</sup>; Domnhall Kelly,  
7   M.Sc.<sup>3</sup>; Jeffrey Hakim, Ph.D.<sup>1</sup>; Bingkun Chen, M.B.A., Ph.D.<sup>1</sup>; Michael J. Yaszemski, M.D.,  
8   Ph.D.<sup>4</sup>; Anthony J. Windebank, M.D.<sup>1</sup>; Nicolas N. Madigan, MB, BCh, BAO, PhD<sup>1</sup>

9   \* denotes equal contribution

10   <sup>1</sup> Dept. of Neurology, Mayo Clinic, Rochester, Minnesota, United States

11   <sup>2</sup> Paracelsus Medical University of Salzburg, Austria

12   <sup>3</sup> National University of Ireland Galway, Galway, Ireland

13   <sup>4</sup> Dept. of Orthopedic Surgery, Mayo Clinic, Rochester, Minnesota, Unites States

14  
15   Corresponding Author: Dr. Nicolas N. Madigan, Department of Neurology, Mayo Clinic, 200  
16   First Street SW, Rochester, MN 55905. E-mail: [madigan.nicolas@mayo.edu](mailto:madigan.nicolas@mayo.edu)

17  
18   Number of Pages: 44

19   Number of Figures: 7

20   Number of Words: (i) Body: 5404 (ii) Abstract: 348

21  
22  
23   Grant Support: This work was generously funded by grants from the National Institute of  
24   Biomedical Imaging and Bioengineering (EB02390), National Institute of Biomedical  
25   Imaging and Bioengineering (TL1 TR002380), Morton Cure Paralysis Fund, and Craig H.  
26   Nielsen Foundation.

27

28

## 1 **Abstract**

2 Spinal cord injury (SCI) results in lifelong paralysis due to the poor regenerative capability of the  
3 central nervous system and the hostile microenvironment that is created from processes such as  
4 inflammation, scarring, axonal dieback, and demyelination. Hydrogel scaffolds facilitate a  
5 permissive regenerative environment and overcome these barriers by reducing scarring. One  
6 important other consideration for axonal regeneration is the availability of nutrients and oxygen,  
7 making it crucial to further investigate vascularization characteristics in the regenerating spinal  
8 cord.

9 We previously described the close relationship between blood vessel formation and axonal  
10 regeneration. In this study, we focused on identifying the vascular – axonal relationship, as well  
11 describing novel techniques to analyze their interactions after a complete T9 spinal cord  
12 transection in rats. Following implantation of positively charged oligo-polyethylene glycol  
13 fumarate (OPF+) scaffolds containing Matrigel-only (MG), Schwann cells (SCs), or SCs with  
14 rapamycin-eluting poly-lactic-co-glycolic acid (PLGA) microspheres (RAPA), stereological  
15 methods were applied to measure core area, blood vessel number, volume, diameter, inter-vessel  
16 distances, total vessel surface and cross-sectional areas, and radial diffusion distances in each  
17 group 6 weeks after implantation.

18 Immuno-histochemical and stereological analysis demonstrated a significantly larger core area in  
19 the RAPA group and found a total of 2,494 myelinated and 4,173 unmyelinated axons at 10  
20 micron circumferential intervals around 708 individual blood vessel profiles within scaffold  
21 channels. We found that axon number and surface density in the SC group exceeded that seen in  
22 the MG and RAPA groups and that higher axonal densities correlated with smaller vessel cross-  
23 sectional areas. Generally, axons were concentrated within a concentric distance of 200 microns

1 from the blood vessel wall, but were excluded from a 25 micron zone immediately adjacent to  
2 the vessel. Using a statistical spatial algorithm to generate cumulative distribution functions of  
3 axons within each scaffold channel type, we demonstrated that axons located around blood  
4 vessels were not randomly distributed.

5 By providing methods to quantify the axonal-vessel relationship, our results refine spinal cord  
6 tissue engineering strategies to optimize the regeneration of complete neurovascular bundles in  
7 their relevant spatial relationships, and further provide better understanding of axon regeneration  
8 in relation to revascularization in SCI.

9

10 *Keywords: Schwann cells, scaffolds, spinal cord, axonal regeneration, revascularization,*

11 *Rapamycin, stereology, Sholl analysis*

12

## 1        **1. Introduction**

2        Traumatic spinal cord injury (SCI) occurs due to a force applied on the spine that leads to  
3        contusion, compression, partial or complete transection of the spinal cord. The primary impact  
4        results in neuronal and vascular disruption, leading to neurological impairments involving  
5        significant motor, sensory and autonomic dysfunction. The damage seen after SCI not only  
6        involves the primary insult but also a long-term secondary injury process which involves axonal  
7        loss, demyelination, inflammation, loss of structural support, cell death, increased inhibitory  
8        molecules, and glial scar formation (1). These secondary events contribute to injury severity and  
9        may also be responsible for poor regenerative potential after SCI. Unlike neurons of the  
10       peripheral nervous system (PNS), neurons in the central nervous system (CNS) have limited  
11       regenerative capacity. Apart from overcoming inhibitory factors present after injury such as glial  
12       scar formation, which acts as a physical barrier to axonal regeneration, one import factor for  
13       axonal regrowth is the availability of nutrients and oxygen, making it crucial to investigate  
14       vascularization in the regenerating spinal cord.

15       An effective method of investigating regeneration following SCI is through the use of  
16       multichannel scaffolds implanted into the transected spinal cord. This model allows for precise  
17       management of the local injury conditions, clear discrimination between true regeneration and  
18       remodeling or distal axonal sprouting (2-5) and reliable quantification (6). Positively-charged  
19       multichannel oligo(poly(ethylene glycol) fumarate) (OPF+) hydrogel scaffolds provide an ideal  
20       platform to control the micro-environment of the regenerating spinal cord and is amongst the  
21       most effective polymers in terms of supporting axonal regeneration (7) as it creates a micro-  
22       environment permissive for axonal regeneration (8). OPF+ was found to have enhanced neuron  
23       adherence, sustained neuron and Schwann cell viability for three weeks and promoted axon

1 myelination *in vitro* compared to other polymers (9). Seeding OPF+ scaffolds with Schwann  
2 cells provides guidance signals and resembles a peripheral nerve like environment, thereby  
3 promoting regeneration and myelination of axons in models of completely transected rats (10).  
4 The seven-channel design used in our investigation overlays important tracts of the rat spinal  
5 cord and enables us to independently assess and compare these structurally separated areas on  
6 each level of rat spine (as reviewed by (11)).

7 Axonal regeneration from neurons above and below the injury site may be impaired by physical  
8 and molecular barriers that form as a consequence of glial scarring and inflammation. Physical  
9 gaps, such as cyst formation, are commonly surrounded by areas of dense fibrosis which inhibits  
10 regeneration. Polymer scaffolds, especially when used to deliver cellular and molecular  
11 therapies, can reduce these barriers by bridging the gap. These scaffolds can resemble viable  
12 tissue with structured order and guide axonal growth through the area of the injury while creating  
13 a permissive regenerative environment by reducing scarring (8, 12). Multichannel OPF+  
14 scaffolds can be further modified by loading them with the anti-fibrotic drug rapamycin  
15 encapsulated into poly(lactic co-glycolic acid) (PLGA) microspheres. Rapamycin is a potent  
16 immunosuppressive drug widely used to prevent allograft organ transplant rejection and has  
17 shown to reduce microglial activation, astrocyte reactivity, macrophage/neutrophil infiltration  
18 and TNF- $\alpha$  secretion in the SCI lesion environment (13, 14). It may also reduce fibrosis in  
19 reaction to various implanted synthetic materials (15, 16). Loading OPF+ scaffolds containing  
20 Schwann cells with rapamycin releasing microspheres was recently shown to reduce the foreign  
21 body response and promoted functional recovery after spinal cord transection in rats and  
22 demonstrated the close relationship between revascularization and axonal regeneration following  
23 spinal cord transection (17).

1 Promotion of new blood vessels, particularly through use of biomaterials and drugs, may confer  
2 protective and regenerative effects after injury (18, 19). Vascular disruption, ischemia and  
3 hemorrhaging occur early after SCI (20). The ruptures of blood vessels, as well as leakiness of  
4 vessels with a disrupted blood spinal cord barrier, contribute to inflammation, ultimately  
5 increasing secondary damage. The formation of an organized and functional vasculature  
6 following SCI is rare (18). However, the relationship of regenerating axons and blood vessels  
7 through biomaterials is not well understood. In addition, finding a proper combination of  
8 biomaterials, cell types, and small molecules remain to be elucidated. Our recent findings  
9 demonstrated the close relationship between blood vessel formation and the number of  
10 regenerating axons (21). We demonstrated that the formation of a capillary structure in turn  
11 supported higher numbers of regenerating axons, implicating the importance of vascular  
12 normalization in the regenerating spinal cord. In this regard, rapamycin may enhance normal  
13 vascularization of regenerating tissue and contributes to normalizing blood vessel distribution  
14 (22-25).

15 As the close correlation between blood vessel formation and improvement of functional recovery  
16 improvement has been well described (26-28), our objective was to assess the spatial  
17 relationships between vasculature and axons in the core area of scaffold channels six weeks after  
18 implantation of OPF+ polymer scaffolds with and without concomitant Schwann cell delivery  
19 and rapamycin administration.

20

21

22

## 1    **2. Material and Methods**

### 2    **2.1    Animals**

3    The study was approved by the Mayo Clinic Institutional Animal Care and Use Committee  
4    (IACUC). We used a total of 18 adult female Fischer rats (approximately 200 g; Harlan  
5    Laboratories, Indianapolis, USA) which were held in conventional housing on a 12 hour light-  
6    dark cycle with free access to water and chow. Care by technicians and veterinarians experienced  
7    in management of rat spinal cord injury were available daily without interruption.

### 8    **2.2    Poly-lactic-co-glycolic acid (PLGA) microsphere fabrication**

9    Drug-eluting microspheres were fabricated using a water-in-oil-in-water double emulsion and  
10    solvent evaporation technique, as we have previously described (17). Briefly, 250 mg of 50:50  
11    D,L-poly-lactic-co-glycolic acid (PLGA) (50:50 DLG 4A, molecular weight 29 kDa, Evonik  
12    Industries AG, Essen, Germany) were dissolved in 1 ml of methylene chloride. 100 µl of a 10  
13    mg/ml solution of rapamycin (Toronto Research Chemicals, Toronto, Canada) in absolute  
14    ethanol, or ethanol vehicle (empty microspheres) were added and emulsified by vortexing. Two  
15    ml of 2% poly(vinyl alcohol) (PVA) (Sigma-Aldrich, St. Louis, MO, USA) were added dropwise  
16    while vortexing for 30 seconds, and the resulting microsphere suspension was then poured into  
17    100 ml of 0.3% PVA under gentle stirring on a magnetic stir plate. After one minute, 100 ml of  
18    2% isopropyl alcohol were added and the suspension was left under gentle stirring for one hour  
19    to evaporate off the methylene chloride. The PLGA microsphere suspension was then  
20    centrifuged at 2500 RPM and washed four times with distilled water. The microspheres were  
21    placed in a -80° C freezer overnight, and freeze-dried under high vacuum.

### 1    **2.3    OPF+ scaffold fabrication**

2    Synthesis of OPF macromere was performed via condensation reaction between polyethylene  
3    glycol (PEG) and triethylamine, as previously described (29). 1g of OPF powder was dissolved  
4    in 650 $\mu$ l of deionized water, 0.05% (w/w) of photoinitiator (Irgacure 2959, Ciba Specialty  
5    Chemicals, Tarrytown, New York, USA) and 0.3 g of N-vinyl pyrrolidinone, a cross-linking  
6    reagent. Chemical modification with the positively charged monomer [2-  
7    (methacryloyloxy)ethyl]-trimethylammonium chloride (MAETAC) (80% wt in water; Sigma-  
8    Aldrich) followed at 20% w/w (9), producing OPF+ polymer solution. 25 mg of PLGA  
9    microspheres were added to 250  $\mu$ l OPF+ liquid polymer thereafter. Scaffold fabrication was as  
10    described previously (7) via injection of the liquid polymer with suspended microspheres into a  
11    tubular glass mold containing seven parallel aligned wires as placeholders for the channel spaces.  
12    The casting was polymerized by 365 nm UV light exposure for one hour. Upon rehydration in  
13    PBS, cylindrical segments were cut to lengths of 2 mm, yielding scaffolds that were 2.6 mm in  
14    diameter and had seven longitudinal channels of 450 $\mu$ m diameter.

### 15    **2.4    Schwann Cell (SC) isolation and culture**

16    SCs were cultured from the sciatic nerve of 2-5 day old rat pups, as we have previously  
17    described (7). Cells were grown in SC media (DMEM/F12 medium containing 10% fetal bovine  
18    serum, 100 units/mL penicillin/streptomycin (Gibco, Grand Island, New York, USA), 2  $\mu$ M  
19    forskolin (Sigma-Aldrich), and 10 ng/mL recombinant human neuregulin-1- $\beta$ 1 extracellular  
20    domain (R&D Systems, Minneapolis, Minnesota, USA)). SCs were initially plated onto 35-mm  
21    laminin-coated dishes and incubated at 37 $^{\circ}$  C in 5% CO<sub>2</sub> for 48 hours, and then transferred to  
22    tissue culture flasks for expansion over 4 passages before use in scaffolds.



## 1    **2.5    OPF+ scaffold loading and surgical scaffold implantation**

2    Scaffolds were sterilized by immersion in serial dilutions of ethanol (80%, 40%, 20% for 20  
3    minutes each), followed by two washes in distilled water and incubation in SC media. OPF+  
4    scaffolds with PLGA microspheres were loaded with SCs or Matrigel alone, as previously  
5    described (6, 10). Scaffolds were loaded with SCs resuspended in 8  $\mu$ l of pre-chilled Matrigel  
6    (BD Biosciences, San Jose, California, USA) at a density of  $10^5$  cells/ $\mu$ l, whereas control animal  
7    scaffolds were loaded with Matrigel alone. Loading was performed using a gel-loading pipette  
8    tip under microscopic view at 4°C temperature, followed by three minutes at 37°C. Loaded  
9    scaffolds were incubated in SC media overnight prior to use in animal surgeries. Animal spinal  
10    cord transection surgical techniques, scaffold implantation and post-operative care were as we  
11    have previously described (8). Anesthesia was performed via intraperitoneal injection of a  
12    ketamine (80 mg/kg; Fort Dodge Animal Health, Fort Dodge, Iowa, USA) and xylazine (5  
13    mg/kg; Lloyd Laboratories, Shenandoah, Iowa, USA). We performed a laminectomy through the  
14    T8-T10 level followed by complete T9 spinal cord transection and OPF+ scaffold implantation  
15    according to the experimental groups in the 2 mm gap between the retracted spinal cord stumps  
16    with their channels parallel to the spinal canal.

## 17    **2.6    Tissue preparation and sectioning**

18    Six weeks post-surgery, animals were sacrificed by intraperitoneal injection of 0.4 mL sodium  
19    pentobarbital (40 mg/kg) (Fort Dodge Animal Health, Fort Dodge, Iowa, USA) and transcardial  
20    perfusion with 4% paraformaldehyde in PBS was performed through the aorta. The vertebral  
21    column with spinal cord was removed en block and post fixed overnight in 4%  
22    paraformaldehyde at 4° C. The lesion site with scaffold and adjacent spinal cord ends were

1 dissected as 15 mm segments from the vertebral column and processed for paraffin embedding.  
2 Segments of spinal cord containing the scaffold were subsequently cut into 10  $\mu$ m transverse  
3 sections on a Reichert-Jung Biocut microtome (Leica, Bannockburn, Illinois, USA) and collected  
4 on numbered slides. Tissue sections from the midpoint of the scaffold length were selected for  
5 subsequent immunohistochemistry analysis.

## 6 **2.7 Antibodies and immunohistochemistry**

7 Primary antibodies were against Tuj-1 ( $\beta$ III-tubulin) for all axons (mouse anti-rat, 1:300,  
8 Millipore Chemicon, Temecula CA USA); myelin basic protein (MBP) for myelinated axons  
9 (goat anti-rat, 1:400, Santa Cruz Biotechnologies, Dallas, TX USA); and collagen IV for vessel  
10 basement membrane (rabbit anti-rat, 1:800, Abcam, Cambridge, Massachussets, USA).  
11 Secondary antibodies included Cy3-conjugated affinity purified donkey anti-mouse IgG (1:200,  
12 Millipore Chemicon) (B-III tubulin); AlexaFluor™ 647-conjugated AffiniPure donkey-anti goat  
13 IgG (1:200, Jackson ImmunoResearch Laboratories, West Grove, Pennsylvania, USA) (MBP);  
14 and Cy2-conjugated donkey anti-rabbit IgG antibody (1:200, Millipore).

15 Slides were deparaffinized in xylene and rehydrated by serial immersion in graded ethanol  
16 (100%, 95%, 70%) and distilled water for 5 minutes each. Antigen retrieval was performed by  
17 immersion in 1 mM EDTA in PBS, pH 8.0 in a steamer for 30 minutes (97 degrees C). Sections  
18 were washed with PBS with 0.1% Triton X-100, and blocked with 10% normal donkey serum in  
19 PBS with 0.1% Triton X-100 for 30 minutes. Primary and secondary antibodies were diluted in  
20 PBS with 5% normal donkey serum and 0.3% Triton X-100. Sections were incubated with  
21 primary antibodies at 4 degrees C overnight and secondary antibodies for 1 hour following

1 washing. Tissue was mounted under glass coverslips using Slow Fade Gold Antifade Reagent  
2 with DAPI nuclear stain (Molecular Probes, Eugene, Oregon, USA).

### 3 **2.8 Image processing**

4 Each individual scaffold channel was imaged using a LSM510 laser scanning confocal  
5 microscope (Carl Zeiss, Inc., Oberkochen, Germany) at 20x magnification to ensure the entire  
6 channel area was captured. A total 72 channels across the three animal groups were intact for  
7 analysis after sectioning and staining, including OPF+ scaffolds with Matrigel and empty PLGA  
8 microspheres (n=6 animals, 16 channels); OPF+ scaffold with SCs and empty PLGA  
9 microspheres (n=6 animals, 34 channels); and OPF+ scaffolds with SCs and rapamycin-eluting  
10 PLGA microspheres (n=6 animals, 22 channels). All image analysis was performed by an  
11 investigator who was blinded to the animal group using the NeuroLucida software (version  
12 11.062, MBF Bioscience, Williston, Vermont, USA).

#### 13 ***2.8.1 Determination of core area, axons and blood vessels***

14 Each channel contained a central, circular core of loose tissue that was histologically distinct  
15 from and circumscribed by dense, laminar tissue extending to the channel wall, as we have  
16 described (21). The core areas were manually outlined and their surface area determined by the  
17 software. Axons staining either with Tuj-1 (unmyelinated), or Tuj-1 co-localizing with MBP  
18 (myelinated) were identified and digitally marked with separate symbols (Figure 1A & 1B). The  
19 manual neuron-tracing tool was repurposed to carefully outline blood vessels along their  
20 innermost surface, and separate markers were then used to assign a number identification (Figure  
21 1F). Vessels could be distinguished from cystic structures by the presence of a distinctive multi-  
22 layered wall containing identifiable endothelial cell nuclei, and subendothelial collagen IV

1 staining around an open lumen (Figure 1C). Blood vessel walls were manually outlined along  
2 their inner lumen surface, and their surface area was measured by the software. Each vessel was  
3 marked with a unique number. Only axons and vessels that were present within the outlined core  
4 boundary were marked and included in the analysis. In the process, a total of 708 blood vessel  
5 profiles, and 6667 axons (2,494 myelinated and 4,173 unmyelinated axons) were marked (Figure  
6 2C).

## 7 **2.9 Sholl analysis**

8 Sholl analysis was used in order to assess the relationship between axon number and distance  
9 from vasculature. The core principle is to count axons falling into concentric circles, which are  
10 centered in the middle of a blood vessel. These counts can then be depicted as a function of their  
11 respective circle radii. Two values are to be predefined, namely the starting radius for the first  
12 circle and the difference in radii to each consecutive circle (Figure 2A). NeuroLucida Explorer  
13 software (MBF Bioscience, Williston, Vermont, USA) was used to perform the analysis. Our  
14 starting radii were defined individually per blood vessel via manual measurement of the biggest  
15 possible diameter using the “Quick Measurement” tool. The radius of each subsequent circle was  
16 automatically determined by addition of 10 $\mu$ m to the previously used radius. This allowed us to  
17 adjust the analysis to individual size and form; thereby avoiding unnecessary measurement of  
18 axon counts in vessel cross-sectional area and warranting a standardized starting point in respect  
19 of vessel size and architecture for each Sholl analysis. Measured diameters ranged from 3.3 to  
20 67.3 $\mu$ m. We distinguished myelinated and unmyelinated axons; an additional total count was  
21 subsequently calculated.

1 Axons, which were expected to be too far apart from the analyzed blood vessels to be possibly  
2 supplied by the same, were excluded after the analysis. In order to warrant a standardized  
3 procedure in doing so, we performed manual distance measurements between all blood vessels of  
4 a channel using the Quick measurement tool in NeuroLucida (MBF Bioscience, Williston,  
5 Vermont, USA). The mean of all intervessel distances of a channel was then used to set a cut-off  
6 level, above which no radius and associated axon count was included in subsequent procedures.  
7 Intervessel distance means ranged from 71.36 to 236.73 $\mu\text{m}$ . All values were double-checked via  
8 second measurements and calculations to avoid a measurement bias and increase the validity of  
9 our numbers respectively.

10 The results were depicted as x/y graphs using Prism's Graph Pad (GraphPad Prism for Windows,  
11 GraphPad Software, La Jolla California USA, [www.graphpad.com](http://www.graphpad.com)), whereby *axon counts* was  
12 plotted on the x and radii on the y axis. Each vessel was represented by an individual graph and  
13 all information was presented for unmyelinated, myelinated and total axon count. A Gaussian  
14 function was then fitted on every graph (Figure 2B). Each vessel's mean peak amplitude, mean  
15 peak distance and their SEMs respectively were transferred to a new table, providing information  
16 for all seven channels of an animal.

17 We performed the analysis for a total of 708 vessels. More detailed numbers can be found in  
18 Figure 2C above. Numbers of vessels and associated axon counts excluded after the Gaussian fit  
19 due to invalid data are presented in Figure 2D. The main reasons for exclusion were very low  
20 axon numbers and other distributions, which did not allow superimposing an accurate Gaussian  
21 curve.

## 1    **2.10 Additional measurements and calculations**

2    The mean peak density of axon number and distance was calculated as the amplitude divided by  
3    the circular area around a vessel, which was determined by the mean peak distance as radius.  
4    This parameter helped us to localize the area of highest vascular support of axonal regeneration.  
5    It was calculated manually using Microsoft Excel (2010 for Windows and 2011 for Mac). Core  
6    areas were calculated as circle area from a mean of two orthogonal diameter measurements per  
7    channel, which helped to account for differences in form. Measurements were performed using  
8    the “Quick Measurement” Tool in NeuroLucida (MBF Bioscience, Williston, Vermont, USA).  
9    Calculations were performed in Microsoft Excel (2010 for Windows and 2011 for Mac). This  
10    allowed us to calculate what we called axon and vessel density. Using the core area, such as  
11    vessel and axon counts, we obtained density numbers for each reference space and channel  
12    respectively.

13    The marking of vessels and axons we had performed via the NeuroLucida software (MBF  
14    Bioscience, Williston, Vermont, USA) allowed us to easily retrieve additional information from  
15    our samples. We obtained the cross-sectional area of each vessel via the NeuroLucida Explorer  
16    software (MBF Bioscience, Williston, Vermont, USA), which calculated it from the vessel  
17    outlines.

18

### 1        3. Results

2        We have previously demonstrated that the use of OPF+ scaffolds containing rapamycin eluting  
3        microspheres were able to reduce the fibrotic reaction and improve functional motor recovery  
4        over 6 weeks (17). Here we sought to investigate the relationship of regenerating axons to the  
5        vasculature through OPF+ scaffolds containing Matrigel only (MG), Schwann cells only (SC), or  
6        Schwann cells with rapamycin (RAPA).

#### 7        3.1 Relationship of core area to axon numbers and density

8        A distinct difference in the extent of scarring, axonal regeneration, and vessel density can be  
9        visually seen between tissue sections of the scaffold in the MG, SC, and RAPA groups (Figure 3  
10        A-C). The channels can be thought be composed of two compartments containing an interior  
11        core of loosely regenerated axons and blood vessels surround by dense fibrotic tissue containing  
12        little or no axons/blood vessels. The axons and blood vessels in the RAPA group take up a  
13        greater area of the channel than the SC and MG groups. The mean core area of the RAPA group  
14        was larger ( $78,042 \pm 6817 \mu\text{m}^2$ ) than the core areas of MG ( $41,829 \pm 4,175 \mu\text{m}^2$ ) ( $p < 0.0001$ ) or  
15        SC ( $51,407 \mu\text{m}^2$ ) ( $p = 0.0013$ ) group (Figure 3D). Although the core area between the MG and SC  
16        groups were not different, there was a trend towards the SC group having a greater core area and  
17        less scarring ( $p = 0.085$ ).

18        Even though the RAPA group had a larger core, the axons appear scattered whereas in the SC  
19        group there are many clusters containing both myelinated and unmyelinated axons (Figure 3).  
20        The SC group ( $147.5 \pm 17.03$  axons/channel) had a significantly greater mean number of axons  
21        per channel than the MG ( $41.78 \pm 8.35$  axons/channel;  $p < 0.0001$ ) or RAPA groups ( $43.23 \pm 7.2$   
22        axons/channel;  $p < 0.0001$ ; Figure 2C & 4A). This relationship held true when the unmyelinated

1 and myelinated axons were counted separately, the SC group had many more myelinated and  
2 unmyelinated axons per channel than the MG or RAPA groups (Figure 2C and 4A). The axon  
3 density was explored (number of axons/core area), the same relationship was found where axon  
4 density of the SC group ( $0.003 \pm 0.00039$  axons/ $\mu\text{m}^2$ ) was greater than that of the MG ( $0.00114$   
5  $\pm 0.00023$  axons/ $\mu\text{m}^2$ ;  $p < 0.0001$ ) or RAPA groups ( $0.0006 \pm 0.0001$  axons/ $\mu\text{m}^2$ ;  $p < 0.0001$ ;  
6 Figure 3E). When the myelinated and unmyelinated axons were separately analyzed, again the  
7 SC group had superior numbers to the MG and RAPA groups.

### 8 **3.2 Relationship of core area to blood vessel numbers and density**

9 In histological samples (Figure 3C), it is observable that the RAPA group had smaller vessels but  
10 not necessarily less. The mean surface area occupied by vessels in the SC group ( $1,529 \pm 286.2$   
11  $\mu\text{m}^2$ ) was significantly higher than of the vessel area in MG ( $666 \pm 164.9 \mu\text{m}^2$ ;  $p = 0.0307$ ) and  
12 RAPA ( $538.8 \pm 120.5 \mu\text{m}^2$ ;  $p = 0.01$ ). There was no significant differences between the number  
13 of vessels between the RAPA group ( $10.41 \pm 0.95$  vessels) when compare to the MG ( $8.313 \pm$   
14  $0.78$  vessels) and SC ( $10.18 \pm 0.62$  vessels) groups (Figure 4B). However, there was a negative  
15 correlation between vessel density and core area in all three groups (MG: Spearman  $r = -0.5795$ ,  
16  $p = 0.0186$ ; SC: Spearman  $r = -0.5129$ ,  $p = 0.0019$ ; RAPA: Spearman  $r = -0.4884$ ,  $p = 0.0211$ ; Figure  
17 3F). As it could be predicted, the mean intervessel distribution in the RAPA group ( $146.1 \pm 8.65$   
18  $\mu\text{m}$ ) was increased when compared to MG ( $96.94 \pm 5.66 \mu\text{m}$ ;  $p < 0.0001$ ) and SC ( $116.5 \pm 3.947$   
19  $\mu\text{m}$ ;  $p = 0.0013$ ; Figure 4F) groups.

20 Unbiased stereology was used to make volumetric measurements of vessel volume, number,  
21 surface area, cross sectional area, diameter, and radial diffusion distance. SC group had large  
22 vessel volume ( $16,528 \pm 3088 \mu\text{m}^3$ ) than MG ( $7745 \pm 147.6 \mu\text{m}^3$ ;  $p = 0.0553$ ) and RAPA ( $8318 \pm$



1 1990  $\mu\text{m}^3$ ;  $p=0.0607$ ; Figure 4C) groups. The total vessel length was not significantly different  
2 between the groups (Figure 4D). The total vessel surface area was greater in the SC group ( $3150$   
3  $\pm 386.1 \mu\text{m}^2$ ) than in the MG ( $1878 \pm 334.5 \mu\text{m}^2$ ;  $p=0.0612$ ) or RAPA ( $2070 \pm 322 \mu\text{m}^2$ ;  
4  $p=0.0999$ ) group, although this comparison was not significant (Figure 4E). The mean cross  
5 sectional area of the vessels also trended towards being greater in the SC group ( $2655 \pm 1178$   
6  $\mu\text{m}^2$ ) than the MG ( $177.2 \pm 71.52 \mu\text{m}^2$ ) or RAPA ( $1376 \pm 1151 \mu\text{m}^2$ ) groups but was not significant  
7 (Figure 4H). The mean vessel diameter was found to be not significantly different between the  
8 groups (Figure 4I), although the RAPA ( $4.14 \pm 1.56 \mu\text{m}$ ) and SC ( $4.93 \pm 0.94 \mu\text{m}$ ) group values  
9 were approximately twice as large as the MG group ( $2.44 \pm 0.47 \mu\text{m}$ ). Radial diffusion distances  
10 were derived from the diameter values and amounted to  $23.68 \pm 1.81 \mu\text{m}$  in the MG,  $28.34 \pm$   
11  $3.52 \mu\text{m}$  in the SC and  $34.37 \mu\text{m}$  in the RAPA group, which were not statistically different  
12 between groups.

### 13 **3.3 Relationship of regenerating axons to blood vessels in the scaffold channels**

14 For each blood vessel, the mean peak distribution amplitude and distance (Figure 5) were plotted  
15 as a function of the respective vessel cross-sectional areas. Greater number of axons was found  
16 in the SC group (Figure 5B and 5E) and fewer myelinated axons were found in the RAPA group  
17 (Figure 5C and 5F). Overall, this analysis demonstrated that smaller vessels support high axon  
18 numbers in all the groups.

19 Plotting mean peak distance versus mean peak amplitude (Figure 6) showed a minimum distance  
20 of approximately  $25 \mu\text{m}$  for the highest axon concentration to the respective vessel. This effect  
21 could be observed throughout all groups and regardless of looking at myelinated, unmyelinated  
22 or total axon count. The effect was slightly less pronounced in the RAPA group. Peak axonal

1 density describes the density of the highest concentration of axons in respect to a circular area,  
2 determined by the mean peak distance as radius and the vessel center as center point. Plotting  
3 these values against vessel cross-sectional area allowed for a correlation analysis between  
4 vascular caliber and support of axonal regeneration (Figure 6C, 6F, and 6I). We found a  
5 significant negative correlation (Spearman  $r=-0.1431$ ,  $p=0.0257$ ) between peaked axonal density  
6 and vessel cross-sectional area analyzing the total axon count of the SC group (Figure 6I). This  
7 demonstrates that smaller vessels support more axons.

### 8 **3.4 Distribution and relationship of regenerating axons to each other**

9 Cumulative distribution functions (CDFs) of inter-axon distances were generated using a  
10 statistical spatial algorithm within each scaffold channel type (Figure 7). Axons can be  
11 distributed as random, clustered, or dispersed points in space (Figure 7A). The closest neighbor  
12 analysis (G-Function; Figure 7B) demonstrated that 90% of axons in the MG or SC groups were  
13 located under 10  $\mu\text{m}$  from the next closest axon (Figure 7D and 7E). The RAPA group (Figure  
14 6F) was more dispersed with 90% of the axons 16  $\mu\text{m}$  from the next closest axon. Analysis of the  
15 distance of an axon to an arbitrary point in space (F-function) showed that axons were distributed  
16 in a clustered distribution (Figure 7G-H), regardless of the condition, since the distance between  
17 axons and random points was smaller than random points alone.

18

## 1        4. Discussion

2        In this study, we demonstrate methods by which axonal regeneration and revascularization can  
3        be quantified. Most of our presented measurements and results are novel in this field, leaving us  
4        with very few other examples and comparable outcomes in the literature. However, the  
5        stereological estimations and the derived calculations used in this study are well established (30)  
6        and stereological quantification of vascular beds of the brain and spinal cord has been described  
7        extensively (31). We have established a relationship between vascular- and growth-supportive  
8        properties of SCs delivered to the injury site via polymer scaffolds with and without concomitant  
9        administration of rapamycin. In doing so, this study focuses on the influence of rapamycin on the  
10       extent of scarring and ultimately how scarring of the scaffold can affect axonal and vessel  
11       distribution. This study identifies the vascular – axonal relationship through extensive  
12       measurements, distribution analyses and stereology of the injury site and described novel  
13       techniques to analyze their interactions after spinal cord injury in three different groups (MG,  
14       SCs, and RAPA). There was a significant negative correlation between peaked axonal density  
15       and vessel-cross sectional area, confirming that a small radial diffusion distance is a necessity for  
16       successful axonal regeneration; supporting previous observations that blood flow rate plays a  
17       major role in axonal regeneration (21).

18       Scaffolds loaded with rapamycin- releasing microspheres were previously found to promote  
19       peripheral nerve regeneration when implanted in the early phase of sciatic nerve injury (32). Our  
20       lab has previously demonstrated that administration of rapamycin resulted in improved  
21       functional recovery following spinal cord transection, which was linked to improved axonal  
22       regeneration, possibly through increased BDNF and GDNF secretion of transplanted SCs (17).  
23       Although rapamycin was found to promote secretion of nerve growth factors, and has been

1 suggested for application in peripheral nerve regeneration therapy (33, 34), our study found a  
2 significantly greater number of myelinated and unmyelinated axons per channel in the SC group,  
3 which were more clustered compared to the MG and RAPA group. This observation makes sense  
4 since rapamycin is an allosteric mTOR inhibitor and mTOR activity has been shown to aid  
5 axonal regeneration following CNS and PNS injuries (35). The results presented here indicate  
6 that improved motor function recovery does not solely depend on higher axon numbers or axon  
7 density, but may also be associated with reduced fibrosis and inflammation. The use of  
8 rapamycin after N-methyl-D-aspartate induced retinal injury showed a decrease in CD45 positive  
9 cells and Iba1 positive cells while having reduced vascular damage (36). In addition, rapamycin  
10 treatment in SCI rats demonstrated to decrease tumor necrosis factor production, reduced the  
11 number of activated microglia, and promoted autophagy resulting in functional improvements  
12 (17, 37). Fibrotic scar formation in the lesion site is also considered to be an obstacle to axonal  
13 regeneration and suppressing this process has been suggested as a reliable strategy to promote  
14 regeneration (38). Rapamycin has been found to inhibit proliferation of fibroblasts, stimulate  
15 their apoptosis and decrease collagen synthesis (39). In correlation with this, we observed a  
16 larger mean core area in the RAPA group, indicating reduced scarring in this group. These  
17 results indicate that while there may not be an increased number of axons, there may be other  
18 routes through which functional benefit can be conferred.

19 Rapamycin administration resulted in smaller vessels, however, without affecting vessel density  
20 compared to the other groups. Few studies have investigated the effects of rapamycin on  
21 vascularization following spinal cord injury; however, there is also substantial evidence for its  
22 anti-angiogenic and growth-inhibitory properties in the nervous system (40-42) , which may be  
23 dose dependent. To our knowledge, this study is the first to provide extensive volumetric

1 measurements to study the effects of rapamycin on vessel volume, number, surface area, cross  
2 sectional area, diameter and radial diffusion distance. There was a significant negative  
3 correlation between peaked axonal density and vessel-cross-sectional area in the SC group and  
4 similar trends in the other animal groups, indicating that smaller vessels support more axons.  
5 Micro-vessels in the CNS are known to provide tremendous trophic support (43) as well as be  
6 critical for tissue survival (44, 45). Furthermore, regenerating axons have been shown to grow  
7 along blood vessels (46). Methods that limit vascular damage, improve vessel density, and  
8 restore blood flow to the injured cord may provide a foundation for spinal cord repair and  
9 recovery (47, 48). A number of other studies reported that increases in blood vessel density  
10 correlate with improvements in recovery after spinal cord injury (26-28). Even though we could  
11 not directly show a significant correlation between axon counts and radial diffusion distances in  
12 the treatment groups, we were able to observe a trend towards higher radial diffusion distances in  
13 the SC group and significantly higher axon counts compared to the MG-only group. Our  
14 stereological estimates found significantly larger inter-vessel distances combined with higher  
15 radial diffusion distances which were associated with decreased axon counts in the RAPA group.  
16 We previously reported that radial diffusion distances in vessels significantly correlate to axon  
17 numbers, demonstrating the need to engineer higher numbers of small vessels in parallel to  
18 improve axonal density (21). This finding should be considered with regard to the relative  
19 equality in total vessel counts throughout the groups and the larger core area. Larger core areas  
20 may negatively affect the blood supply in RAPA loaded scaffolds, as vasculature must support a  
21 larger area which in turn could play a role in the reduced axon counts.

22 The distribution of axons and blood vessels plays an important role in development. When  
23 neuropilin 1 (NRP1) is knocked out of endothelial cells in a mouse model, there was abnormal

1 formation of vessels in the optic nerve which lead to abnormal axon distribution (49). Normally  
2 the vessels line the outside of the axon bundle, however with this mutation the vessels are seen  
3 penetrating the axon bundles leading to exclusion zones where abnormal holes are found in the  
4 optic nerve. In addition, the vessel diameter was found to be larger in the *Nrpf<sup>fl/-</sup>;Tie2-Cre*  
5 mutants, suggesting that smaller blood vessels facilitate passive co-existence with axons. These  
6 findings match with our findings in the spinal cord that smaller diameter vessels and close axon  
7 bundles were associated with higher axon counts, suggesting that the interplay between vessel  
8 size and distance can greatly influence axon distribution and regeneration. In attempting to  
9 promote regeneration, there is a balance between vessels being able to remove waste and provide  
10 growth factors without obstructing axon growth.

11 Using cumulative distribution functions (CDFs) we were able to identify a clustered appearance  
12 of axons in the SC and partly MG group, whereas axons in the RAPA group usually seemed to  
13 be localized alone in a dispersed distribution. RAPA prevents the formation of a fibrotic scar that  
14 may lead to a more dispersed distribution but there was no contribution to axon number. The  
15 closest neighbor axon in the RAPA group was 16  $\mu\text{m}$ , whereas in the other conditions they were  
16 10  $\mu\text{m}$  apart. Axon proximity may be an important but understudied aspect in neuroregeneration.  
17 In development, axons connecting from the retina to the lateral geniculate nucleus (LGN) follow  
18 not only chemical but electrical cues (50). Meister *et al.* (1991) demonstrated that axons that are  
19 the nearest to each other are electrically active at the same time and this simultaneous activity  
20 can influence the environment to help navigate to the target together. Furthermore, blocking  
21 electrical activity with tetrodotoxin in the LGN during development leads to abnormal patterning  
22 of connections to the visual cortex, highlighting the importance of electrical signaling between  
23 neighboring neurons (51). The closer proximity and greater number of axons could aid in

1 pathfinding of spinal axons in OPF scaffolds as well. However, we have previously  
2 demonstrated that the use of rapamycin containing scaffolds loaded with Schwann cells resulted  
3 in better functional recovery following SCI, demonstrating the increased axonal number is not  
4 the only factor in functional recovery but reduction in inflammation and scarring can contribute  
5 through other mechanisms.

## 6 **5. Conclusion**

7 Angiogenesis plays a major role in axonal regeneration following SCI and we have developed  
8 novel methods to investigate axon-vessel relationships. Our study found differences in axonal  
9 regeneration, scarring and vessel density, which were measured and visually detected between  
10 the three scaffold groups (MG, SC and RAPA). Our measurements provide highly relevant  
11 methods to further study the regenerative environment after SCI and will help future  
12 investigations in this field.

## 13 **Acknowledgments:**

14 This work was generously funded by grants from the National Institute of Biomedical Imaging  
15 and Bioengineering (EB02390), National Institute of Biomedical Imaging and Bioengineering  
16 (TL1 TR002380), Morton Cure Paralysis Fund, and Craig H. Nielsen Foundation. The author  
17 would like to acknowledge the technical assistance of Jarred Nesbitt and administrative  
18 assistance of Jane Meyer.

## 19 **Conflict of Interest:**

20 No conflict of interests.

1   **References:**

- 2   1. Siddiqui, A.M., Khazaei, M., and Fehlings, M.G. Translating mechanisms of neuroprotection,  
3   regeneration, and repair to treatment of spinal cord injury. *Progress in brain research: Elsevier*;  
4   2015. pp. 15.
- 5   2. Friedman, J.A., Moore, M.J., Yaszemski, M.J., Lewellyn, E., Spinner, R.J., Currier, B.L.,  
6   and Windebank, A.J. Biodegradable polymer implants to promote axonal regeneration following  
7   spinal cord injury. Program No 2032 2002 Abstract Viewer/Itinerary Planner Washington, DC:  
8   Society for Neuroscience Online 2002.
- 9   3. Xu, X.M., Zhang, S.X., Li, H., Aebischer, P., and Bunge, M.B. Regrowth of axons into the  
10   distal spinal cord through a Schwann-cell-seeded mini-channel implanted into hemisectioned adult  
11   rat spinal cord. *Eur J Neurosci* **11**, 1723, 1999.
- 12   4. Oudega, M., and Xu, X.M. Schwann cell transplantation for repair of the adult spinal cord. *J*  
13   *Neurotrauma* **23**, 453, 2006.
- 14   5. Teng, Y.D., Lavik, E.B., Qu, X., Park, K.I., Ourednik, J., Zurakowski, D., Langer, R.,  
15   and Snyder, E.Y. Functional recovery following traumatic spinal cord injury mediated by a  
16   unique polymer scaffold seeded with neural stem cells. *Proceedings of the National Academy of*  
17   *Sciences* **99**, 3024, 2002.
- 18   6. Olson, H.E., Rooney, G.E., Gross, L., Nesbitt, J.J., Galvin, K.E., Knight, A., Chen, B.,  
19   Yaszemski, M.J., and Windebank, A.J. Neural stem cell- and schwann cell-loaded biodegradable  
20   polymer scaffolds support axonal regeneration in the transected spinal cord. *Tissue Eng Part A*  
21   **15**, 1797, 2009.
- 22   7. Chen, B.K., Knight, A.M., Madigan, N.N., Gross, L., Dadsetan, M., Nesbitt, J.J., Rooney,  
23   G.E., Currier, B.L., Yaszemski, M.J., Spinner, R.J., and Windebank, A.J. Comparison of polymer



- 1 scaffolds in rat spinal cord: A step toward quantitative assessment of combinatorial approaches
- 2 to spinal cord repair. *Biomaterials* **32**, 8077, 2011.
- 3 8. Hakim, J.S., Esmaceli Rad, M., Grahn, P.J., Chen, B.K., Knight, A.M., Schmeichel, A.M.,
- 4 Isaq, N.A., Dadsetan, M., Yaszemski, M.J., and Windebank, A.J. Positively Charged
- 5 Oligo[Poly(Ethylene Glycol) Fumarate] Scaffold Implantation Results in a Permissive Lesion
- 6 Environment after Spinal Cord Injury in Rat. *Tissue Eng Part A* **21**, 2099, 2015.
- 7 9. Dadsetan, M., Knight, A.M., Lu, L., Windebank, A.J., and Yaszemski, M.J. Stimulation of
- 8 neurite outgrowth using positively charged hydrogels. *Biomaterials* **30**, 3874, 2009.
- 9 10. Chen, B.K., Knight, A.M., de Ruiters, G.C.W., Yaszemski, M.J., Currier, B.L.,
- 10 and Windebank, A.J. Axon regeneration through scaffold into distal spinal cord after transection.
- 11 *J Neurotrauma* **26**, 1759, 2009.
- 12 11. Madigan, N.N., McMahon, S., O'Brien, T., Yaszemski, M.J., and Windebank, A.J. Current
- 13 tissue engineering and novel therapeutic approaches to axonal regeneration following spinal cord
- 14 injury using polymer scaffolds. *Respir Physiol Neurobiol* **169**, 183, 2009.
- 15 12. Madigan, N.N., Rooney, G., Knight, A., Chen, B., Gross, L., Dadsetan, M., Nesbitt, J.,
- 16 Yaszemski, M., McMahon, S., and Windebank, A. Axonal regeneration supported by
- 17 neurotrophic Schwann cells and mesenchymal stem cells through polymer scaffolds in the
- 18 transected rat spinal cord. Society for Neuroscience, Program No 3652/CC71, Chicago, IL 2009.
- 19 13. Goldshmit, Y., Kanner, S., Zacs, M., Frisca, F., Pinto, A.R., Currie, P.D., and Pinkas-
- 20 Kramarski, R. Rapamycin increases neuronal survival, reduces inflammation and astrocyte
- 21 proliferation after spinal cord injury. *Mol Cell Neurosci* **68**, 82, 2015.

- 1 14. Tateda, S., Kanno, H., Ozawa, H., Sekiguchi, A., Yahata, K., Yamaya, S., and Itoi, E.  
2 Rapamycin suppresses microglial activation and reduces the development of neuropathic pain  
3 after spinal cord injury. *J Orthop Res* **35**, 93, 2017.
- 4 15. Morice, M.C., Serruys, P.W., Sousa, J.E., Fajadet, J., Ban Hayashi, E., Perin, M., Colombo,  
5 A., Schuler, G., Barragan, P., Guagliumi, G., Molnar, F., and Falotico, R. A randomized  
6 comparison of a sirolimus-eluting stent with a standard stent for coronary revascularization. *N*  
7 *Engl J Med* **346**, 1773, 2002.
- 8 16. Moses, J.W., Leon, M.B., Popma, J.J., Fitzgerald, P.J., Holmes, D.R., O'Shaughnessy, C.,  
9 Caputo, R.P., Kereiakes, D.J., Williams, D.O., Teirstein, P.S., Jaeger, J.L., and Kuntz, R.E.  
10 Sirolimus-eluting stents versus standard stents in patients with stenosis in a native coronary  
11 artery. *N Engl J Med* **349**, 1315, 2003.
- 12 17. Hakim, J.S., Rodysill, B.R., Chen, B.K., Schmeichel, A.M., Yaszemski, M.J., Windebank,  
13 A.J., and Madigan, N.N. Combinatorial Tissue Engineering Partially Restores Function after  
14 Spinal Cord Injury. *Journal of tissue engineering and regenerative medicine* 2019.
- 15 18. Haggerty, A.E., Maldonado-Lasunción, I., and Oudega, M. Biomaterials for revascularization  
16 and immunomodulation after spinal cord injury. *Biomedical Materials* **13**, 044105, 2018.
- 17 19. Siddiqui, A.M., Ahuja, C.S., Tator, C.H., and Fehlings, M.G. Chapter 3: Spinal cord  
18 protective and regenerative therapies. In: Jallo J., Vaccaro A., eds. *Neurotrauma and Critical*  
19 *Care of the Spine; Second Edition*. Second ed: Thieme; 2018. pp. 238.
- 20 20. Tator, C.H., and Fehlings, M.G. Review of the secondary injury theory of acute spinal cord  
21 trauma with emphasis on vascular mechanisms. *Journal of neurosurgery* **75**, 15, 1991.
- 22 21. Madigan, N.N., Chen, B.K., Knight, A.M., Rooney, G.E., Sweeney, E., Kinnavane, L.,  
23 Yaszemski, M.J., Dockery, P., O'Brien, T., McMahon, S.S., and Windebank, A.J. Comparison of

- 1 Cellular Architecture, Axonal Growth, and Blood Vessel Formation Through Cell-Loaded  
2 Polymer Scaffolds in the Transected Rat Spinal Cord. *Tissue Eng Part A* **20**, 2985, 2014.
- 3 22. Guba, M., von Breitenbuch, P., Steinbauer, M., Koehl, G., Flegel, S., Hornung, M., Bruns,  
4 C.J., Zuelke, C., Farkas, S., Anthuber, M., Jauch, K.W., and Geissler, E.K. Rapamycin inhibits  
5 primary and metastatic tumor growth by antiangiogenesis: involvement of vascular endothelial  
6 growth factor. *Nat Med* **8**, 128, 2002.
- 7 23. Jain, R.K. Normalizing tumor vasculature with anti-angiogenic therapy: a new paradigm for  
8 combination therapy. *Nat Med* **7**, 987, 2001.
- 9 24. Jain, R.K. Normalization of tumor vasculature: an emerging concept in antiangiogenic  
10 therapy. *Science* **307**, 58, 2005.
- 11 25. Gao, K., Wang, Y.S., Yuan, Y.J., Wan, Z.H., Yao, T.C., Li, H.H., Tang, P.F., and Mei, X.F.  
12 Neuroprotective effect of rapamycin on spinal cord injury via activation of the Wnt/beta-catenin  
13 signaling pathway. *Neural Regen Res* **10**, 951, 2015.
- 14 26. Glaser, J., Gonzalez, R., Sadr, E., and Keirstead, H.S. Neutralization of the chemokine  
15 CXCL10 reduces apoptosis and increases axon sprouting after spinal cord injury. *Journal of*  
16 *neuroscience research* **84**, 724, 2006.
- 17 27. Kaneko, S., Iwanami, A., Nakamura, M., Kishino, A., Kikuchi, K., Shibata, S., Okano, H.J.,  
18 Ikegami, T., Moriya, A., and Konishi, O. A selective Sema3A inhibitor enhances regenerative  
19 responses and functional recovery of the injured spinal cord. *Nature medicine* **12**, 1380, 2006.
- 20 28. Yoshihara, T., Ohta, M., Itokazu, Y., Matsumoto, N., Dezawa, M., Suzuki, Y., Taguchi, A.,  
21 Watanabe, Y., Adachi, Y., and Ikehara, S. Neuroprotective effect of bone marrow-derived  
22 mononuclear cells promoting functional recovery from spinal cord injury. *Journal of*  
23 *Neurotrauma* **24**, 1026, 2007.

- 1 29. Dadsetan, M., Szatkowski, J.P., Yaszemski, M.J., and Lu, L. Characterization of photo-cross-  
2 linked oligo[poly(ethylene glycol) fumarate] hydrogels for cartilage tissue engineering.  
3 *Biomacromolecules* **8**, 1702, 2007.
- 4 30. Howard, V., and Reed, M. Unbiased stereology: three-dimensional measurement in  
5 microscopy: Garland Science; 2004.
- 6 31. Dockery, P., and Fraher, J. The quantification of vascular beds: a stereological approach.  
7 *Experimental and molecular pathology* **82**, 110, 2007.
- 8 32. Si, H.B., Zeng, Y., Lu, Y.R., Cheng, J.Q., and Shen, B. Control-released basic fibroblast  
9 growth factor-loaded poly-lactic-co-glycolic acid microspheres promote sciatic nerve  
10 regeneration in rats. *Experimental and therapeutic medicine* **13**, 429, 2017.
- 11 33. Ding, T., Zhu, C., Yin, J.-B., Zhang, T., Lu, Y.-C., Ren, J., and Li, Y.-Q. Slow-releasing  
12 rapamycin-coated bionic peripheral nerve scaffold promotes the regeneration of rat sciatic nerve  
13 after injury. *Life sciences* **122**, 92, 2015.
- 14 34. Liu, F., Zhang, H., Zhang, K., Wang, X., Li, S., and Yin, Y. Rapamycin promotes Schwann  
15 cell migration and nerve growth factor secretion. *Neural regeneration research* **9**, 602, 2014.
- 16 35. Abe, N., Borson, S.H., Gambello, M.J., Wang, F., and Cavalli, V. Mammalian target of  
17 rapamycin (mTOR) activation increases axonal growth capacity of injured peripheral nerves.  
18 *Journal of Biological Chemistry* **285**, 28034, 2010.
- 19 36. Aoki, Y., Nakahara, T., Asano, D., Ushikubo, H., Mori, A., Sakamoto, K., and Ishii, K.  
20 Preventive effects of rapamycin on inflammation and capillary degeneration in a rat model of  
21 NMDA-induced retinal injury. *Biological and Pharmaceutical Bulletin* **38**, 321, 2015.

- 1 37. Chen, H.-C., Fong, T.-H., Hsu, P.-W., and Chiu, W.-T. Multifaceted effects of rapamycin on  
2 functional recovery after spinal cord injury in rats through autophagy promotion, anti-  
3 inflammation, and neuroprotection. *Journal of surgical research* **179**, e203, 2013.
- 4 38. Yoshioka, N., Hisanaga, S.I., and Kawano, H. Suppression of fibrotic scar formation  
5 promotes axonal regeneration without disturbing blood-brain barrier repair and withdrawal of  
6 leukocytes after traumatic brain injury. *Journal of Comparative Neurology* **518**, 3867, 2010.
- 7 39. Sun, Y., Zhao, S., Li, X., Yan, L., Wang, J., Wang, D., Chen, H., Dai, J., and He, J. Local  
8 application of rapamycin reduces epidural fibrosis after laminectomy via inhibiting fibroblast  
9 proliferation and prompting apoptosis. *Journal of orthopaedic surgery and research* **11**, 58, 2016.
- 10 40. Guba, M., von Breitenbuch, P., Steinbauer, M., Koehl, G., Flegel, S., Hornung, M., Bruns,  
11 C.J., Zuelke, C., Farkas, S., and Anthuber, M. Rapamycin inhibits primary and metastatic tumor  
12 growth by antiangiogenesis: involvement of vascular endothelial growth factor. *Nature medicine*  
13 **8**, 128, 2002.
- 14 41. Dejneka, N.S., Kuroki, A.M., Fosnot, J., Tang, W., Tolentino, M.J., and Bennett, J. Systemic  
15 rapamycin inhibits retinal and choroidal neovascularization in mice. *Mol Vis* **10**, 964, 2004.
- 16 42. Yagasaki, R., Nakahara, T., Ushikubo, H., Mori, A., Sakamoto, K., and Ishii, K. Anti-  
17 angiogenic effects of mammalian target of rapamycin inhibitors in a mouse model of oxygen-  
18 induced retinopathy. *Biological and Pharmaceutical Bulletin* **37**, 1838, 2014.
- 19 43. Raab, S., and Plate, K.H. Different networks, common growth factors: shared growth factors  
20 and receptors of the vascular and the nervous system. *Acta neuropathologica* **113**, 607, 2007.
- 21 44. Richardson, T.P., Peters, M.C., Ennett, A.B., and Mooney, D.J. Polymeric system for dual  
22 growth factor delivery. *Nature biotechnology* **19**, 1029, 2001.

- 1 45. Peters, M.C., Polverini, P.J., and Mooney, D.J. Engineering vascular networks in porous  
2 polymer matrices. *Journal of Biomedical Materials Research: An Official Journal of The Society*  
3 *for Biomaterials, The Japanese Society for Biomaterials, and The Australian Society for*  
4 *Biomaterials and the Korean Society for Biomaterials* **60**, 668, 2002.
- 5 46. Bearden, S.E., and Segal, S.S. Neurovascular alignment in adult mouse skeletal muscles.  
6 *Microcirculation* **12**, 161, 2005.
- 7 47. Ng, M.T., Stammers, A.T., and Kwon, B.K. Vascular disruption and the role of angiogenic  
8 proteins after spinal cord injury. *Translational stroke research* **2**, 474, 2011.
- 9 48. Furlan, J.C., and Fehlings, M.G. Cardiovascular complications after acute spinal cord injury:  
10 pathophysiology, diagnosis, and management. *Neurosurgical focus* **25**, E13, 2008.
- 11 49. Erskine, L., François, U., Denti, L., Joyce, A., Tillo, M., Bruce, F., Vargesson, N.,  
12 and Ruhrberg, C. VEGF-A and neuropilin 1 (NRP1) shape axon projections in the developing  
13 CNS via dual roles in neurons and blood vessels. *Development* **144**, 2504, 2017.
- 14 50. Meister, M., Wong, R., Baylor, D., and Shatz, C. Synchronous bursts of action potentials in  
15 ganglion cells of the developing mammalian retina. *Science* **252**, 939, 1991.
- 16 51. Catalano, S.M., and Shatz, C.J. Activity-Dependent Cortical Target Selection by Thalamic  
17 Axons. *Science* **281**, 559, 1998.

18

19

20

21

22

23

1 **Figures:**

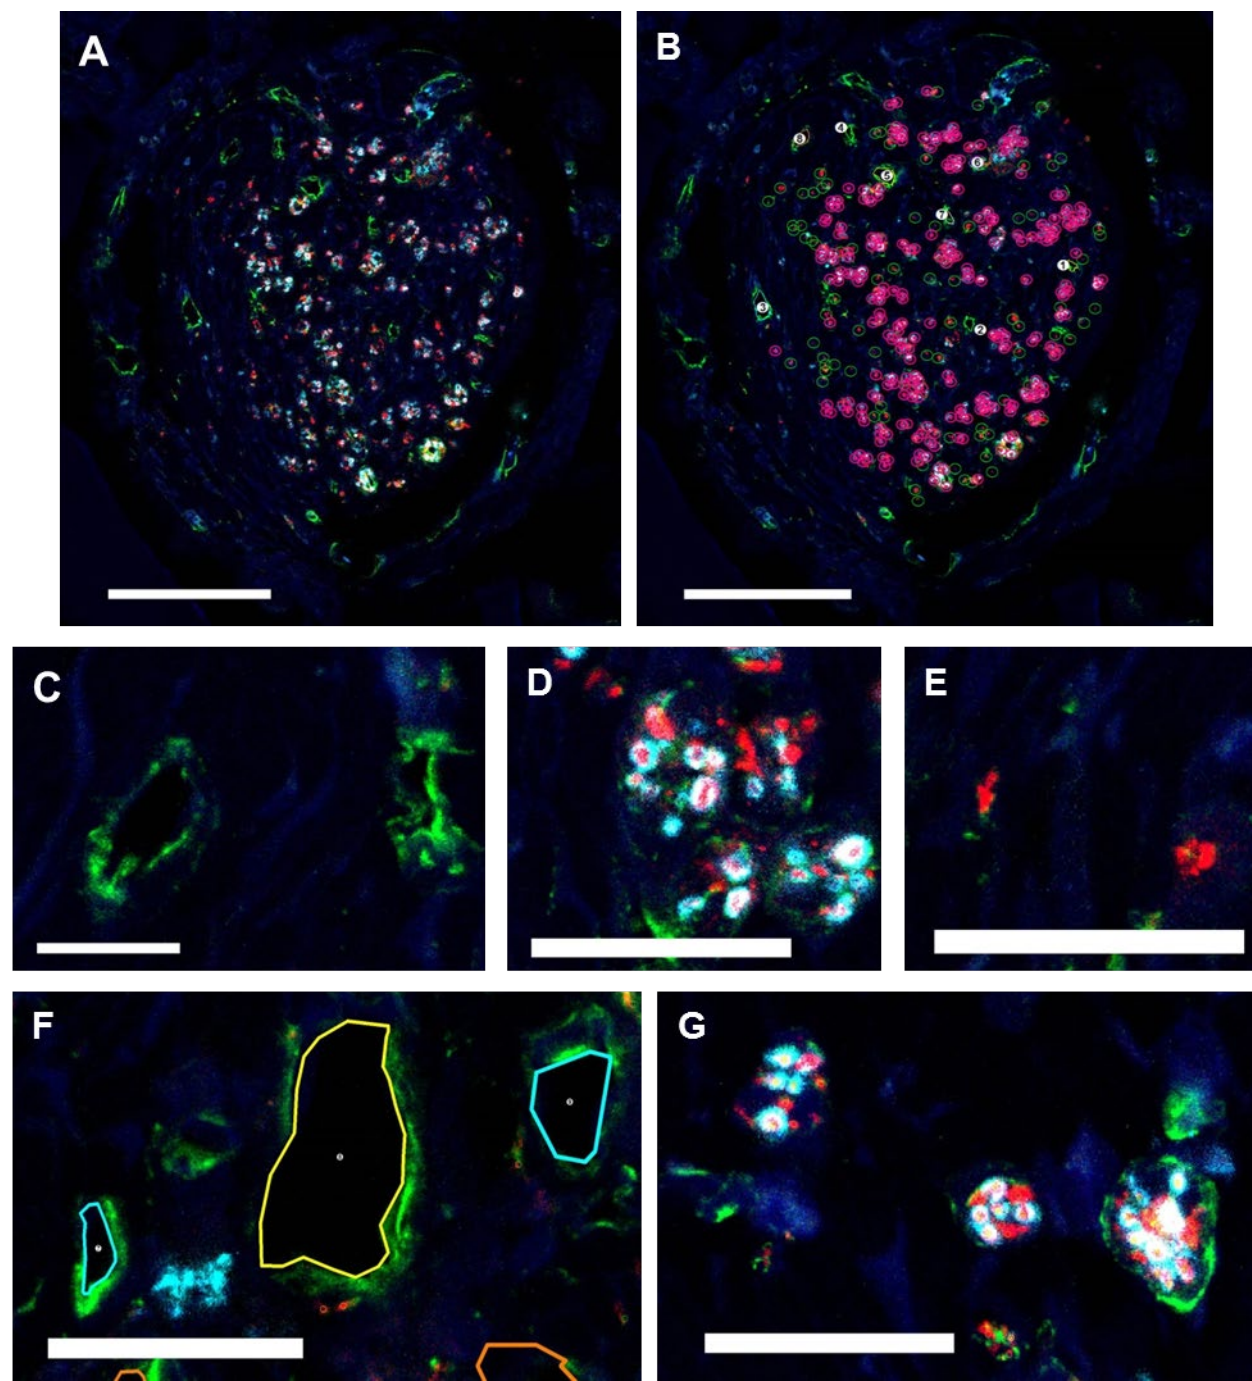

2

3

4

5

1 **Figure 1: Image processing using Neurolucida software to mark and measure vessels,**  
2 **myelinated axons, and unmyelinated axons through an OPF+ scaffold. (A)** Example of a  
3 confocal image of a channel in the OPF+ scaffold following spinal cord implantation before  
4 marking and **(B)** after marking. DAPI (blue), neuron were labelled with  $\beta$ -tubulin (red), myelin  
5 basic protein is used to label the myelin (cyan), and collagen IV was used to mark the blood  
6 vessels (green). Scale bar = 100  $\mu$ m. **(C)** Example of 2 blood vessels before marking. Collagen  
7 IV (green) surrounds an empty vessel lumen. **(D)** Myelinated axons and unmyelinated axons can  
8 be determine by the presences of a myelin basic protein ‘halo’ (cyan) around a punctate axon  
9 containing  $\beta$ -tubulin (red). **(E)** Unmyelinated axons. **(F)** Marked and outlined blood vessels. **(G)**  
10 Marked myelinated and unmyelinated axons. Scale bar = 30  $\mu$ m.

11

12

13

14

15

16

17

18

19

20



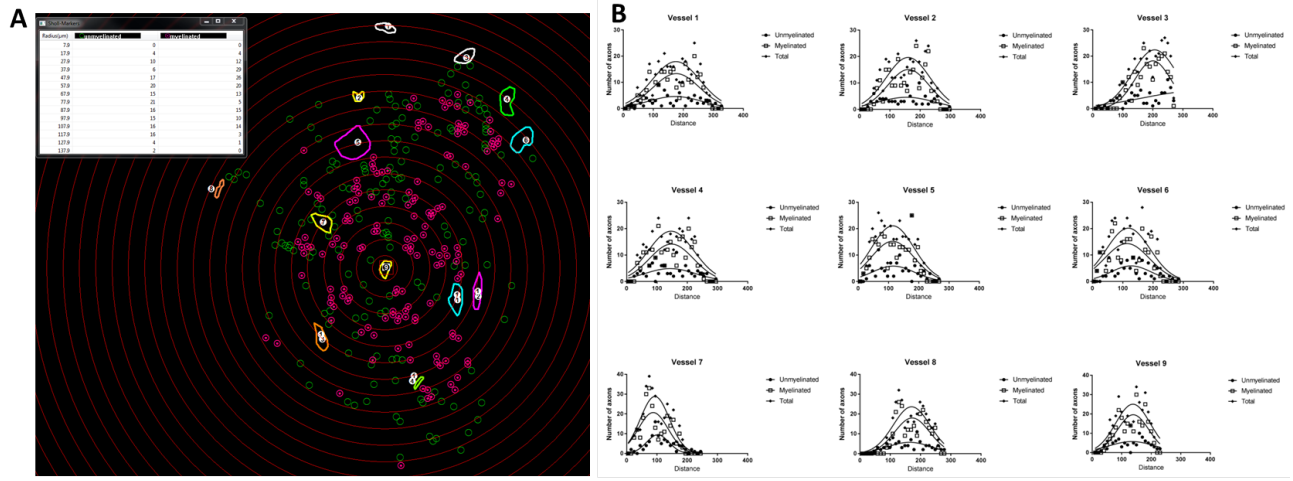

**C**

| Marked structure: | Vessels    | um Axons    | m Axons     | Total Axons |
|-------------------|------------|-------------|-------------|-------------|
| MG                | 133        | 495         | 207         | 702         |
| SC                | 346        | 2796        | 2218        | 5014        |
| RAPA              | 229        | 882         | 69          | 951         |
| <b>Total</b>      | <b>708</b> | <b>4173</b> | <b>2494</b> | <b>6667</b> |

[Number of channels: 16 Matrigel; 34 SC; 22 SC + Rapamycin.]

**D**

| excluded values | entire vessels | um     | m       | total |
|-----------------|----------------|--------|---------|-------|
| MG              | 55             | 68/13  | 105/50  | 59/4  |
| SC              | 71             | 105/50 | 166/95  | 98/27 |
| RAPA            | 65             | 74/11  | 225/160 | 82/17 |

1

2

3

4

5

6

7

8

9

1 **Figure 2: Sholl analysis was conducted and Gaussian function was fitted to the data to**  
2 **determine the relationship between axon number and distance from vasculature. (A)**  
3 Measurement of axon distribution was done using concentric circles (10  $\mu\text{m}$  apart) with the  
4 vessel being analyzed in the center. Results are depicted as circle radius for unmyelinated (open  
5 circles) and myelinated axons (encircled points). **(B)** The number of axons within each 10  
6 micron radial increment was then plotted as a function of the distance for each blood vessel, and  
7 consistently demonstrated a Gaussian distribution. This data can be compressed by using mean  
8 peak amplitude to sample axon number and mean peak distance to sample axonal distances from  
9 the vessel. **(C)** Markings in each OPF+ scaffold channel for unmyelinated, myelinated axons,  
10 and blood vessels in each animal group were measured as cumulative counts. **(D)** The number of  
11 axons and vessels excluded after Gaussian fit due to invalid data such as low axon numbers.

12

13

14

15

16

17

18

19

20

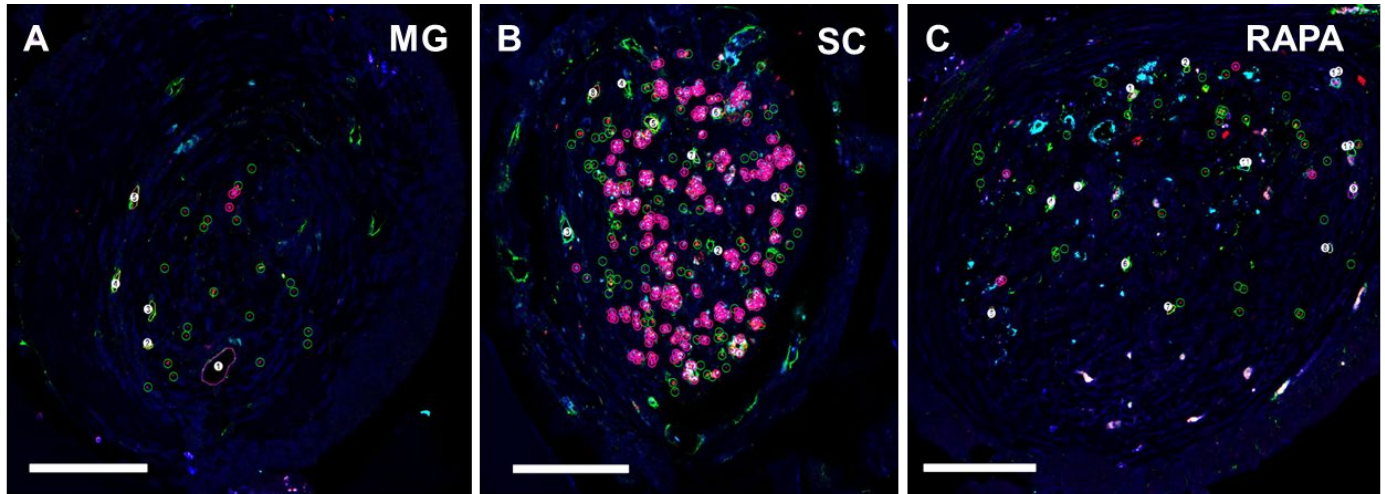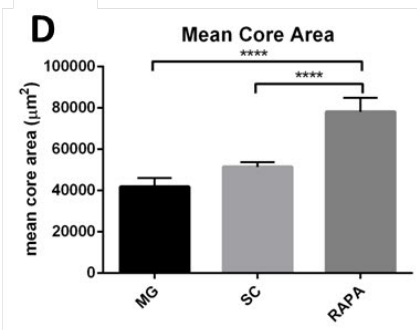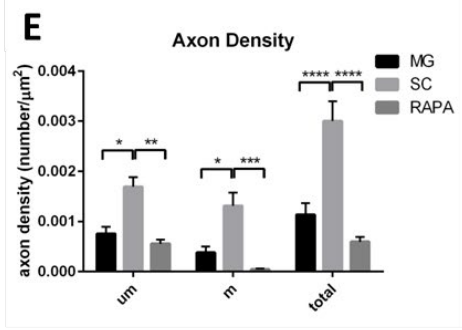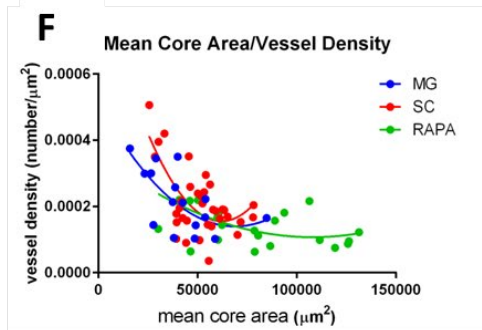

1

2

3

4

5

6

7

8

9

1 **Figure 3: Axon and blood vessel density in relationship to core area.** The core area, axon  
2 number, and blood vessel numbers were determined using NeuroLucida software for rats  
3 implanted with OPF+ scaffold channels containing (A) matrigel only (MG), (B) Schwann cells  
4 (SC), or (C) Schwann cells with rapamycin microspheres (RAPA). Scale bar = 100  $\mu$ m. (D) Rats  
5 in the RAPA group had a larger mean core area than those in the SC or MG groups. (E) SC  
6 group had greater axon densities in all categories (um=unmyelinated, m=myelinated) when  
7 compared to RAPA and MG groups. (F) There was a negative correlation between mean core are  
8 and vessel density for all groups.

9

10

11

12

13

14

15

16

17

18

19

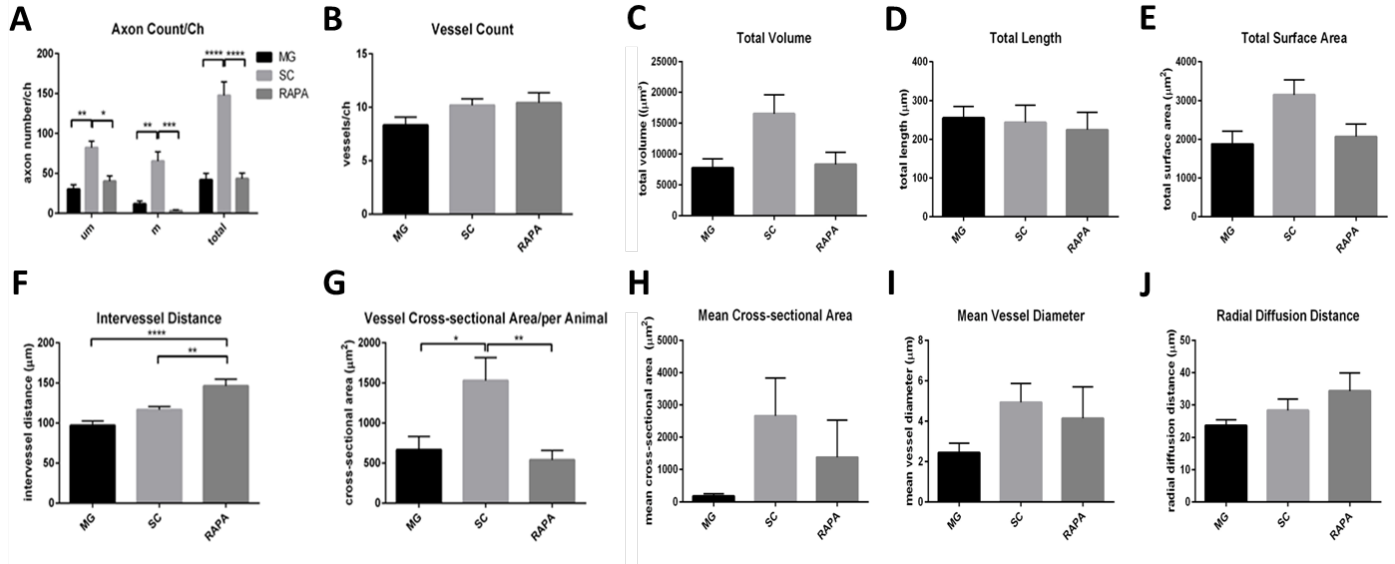

1

2

3

4

5

6

7

8

9

10

11

1 **Figure 4: Axon counts, vessel counts, and other vessel characteristics determined by**  
2 **stereological analysis of scaffolds implanted in the transected spinal cord. (A)** Mean axon  
3 counts per scaffold channel. Schwann cell loaded channels (SC) supported more myelinated and  
4 unmyelinated axonal regeneration than Matrigel (MG) or Schwann cell scaffolds eluting  
5 rapamycin (RAPA). **(B)**. Mean amount of blood vessels per scaffold channel. **(C)** Serological  
6 estimates were made to determine blood vessel volume, **(D)** length, and **(E)** surface area. **(F)**  
7 Blood vessels were further characterized by their intervessel distances, and **(G)** mean cross-  
8 sectional area in each group. **(H)** Stereological estimates were also made to determine the mean  
9 cross sectional area of the blood vessels, **(I)** means blood vessel diameter, and the **(J)** radial  
10 diffusion area. Stereology helped determine that the number of vessels was the same in each  
11 group, vessels were larger in Schwann cell only animals, and the distances between vessels was  
12 greater with rapamycin treatment.

13

14

15

16

17

18

19

20

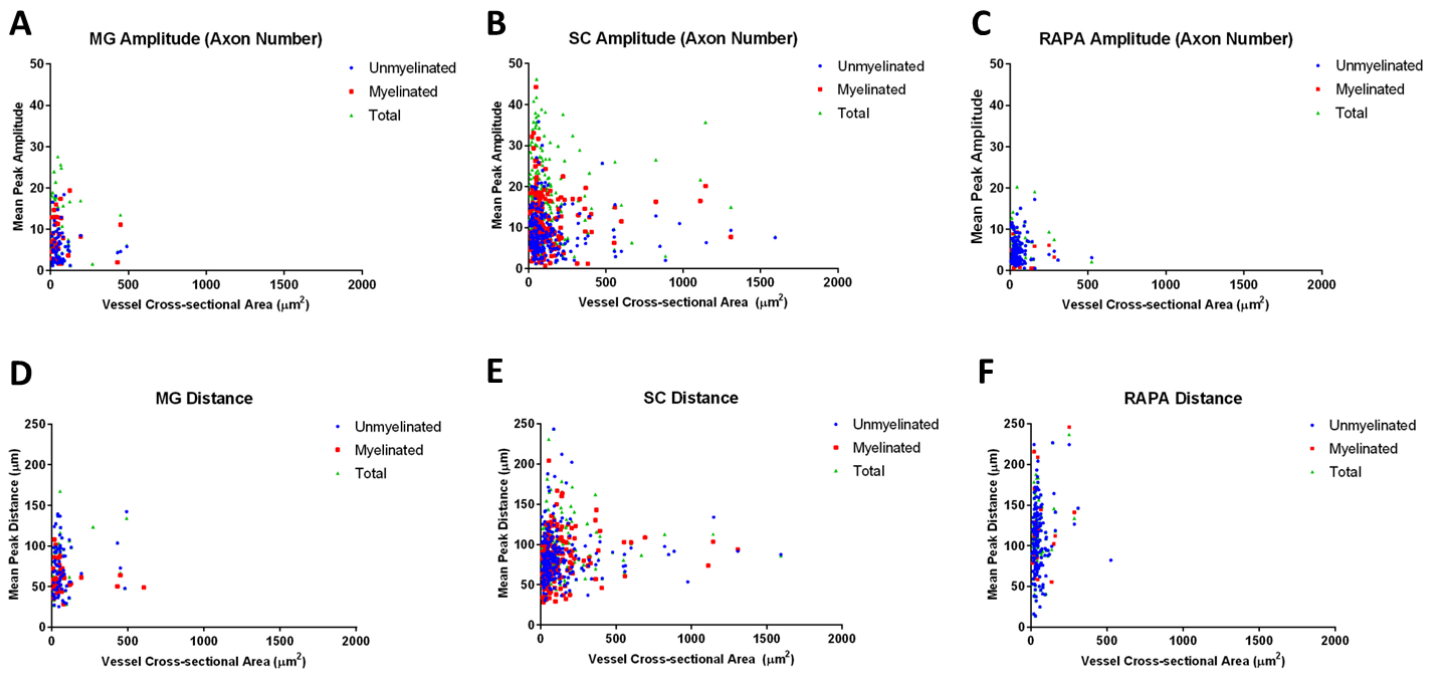

1

2

3

4

5

6

7

8

9

10

1 **Figure 5: Mean peak amplitude and mean peak distance of axons compared to blood vessel**  
2 **cross sectional area.** Unmyelinated, myelinated, and total axon counts were represented by  
3 individual graphs for each vessel. The graph was fitted to a Gaussian function and then the **(A-C)**  
4 mean peak amplitude and **(D-F)** mean peak distance was calculated for rats treated with OPF+  
5 scaffolds containing Matrigel (MG), Schwann cells (SC), or Schwann cells with rapamycin  
6 microspheres (RAPA).

7

8

9

10

11

12

13

14

15

16

17

18

19

20

21

22

23



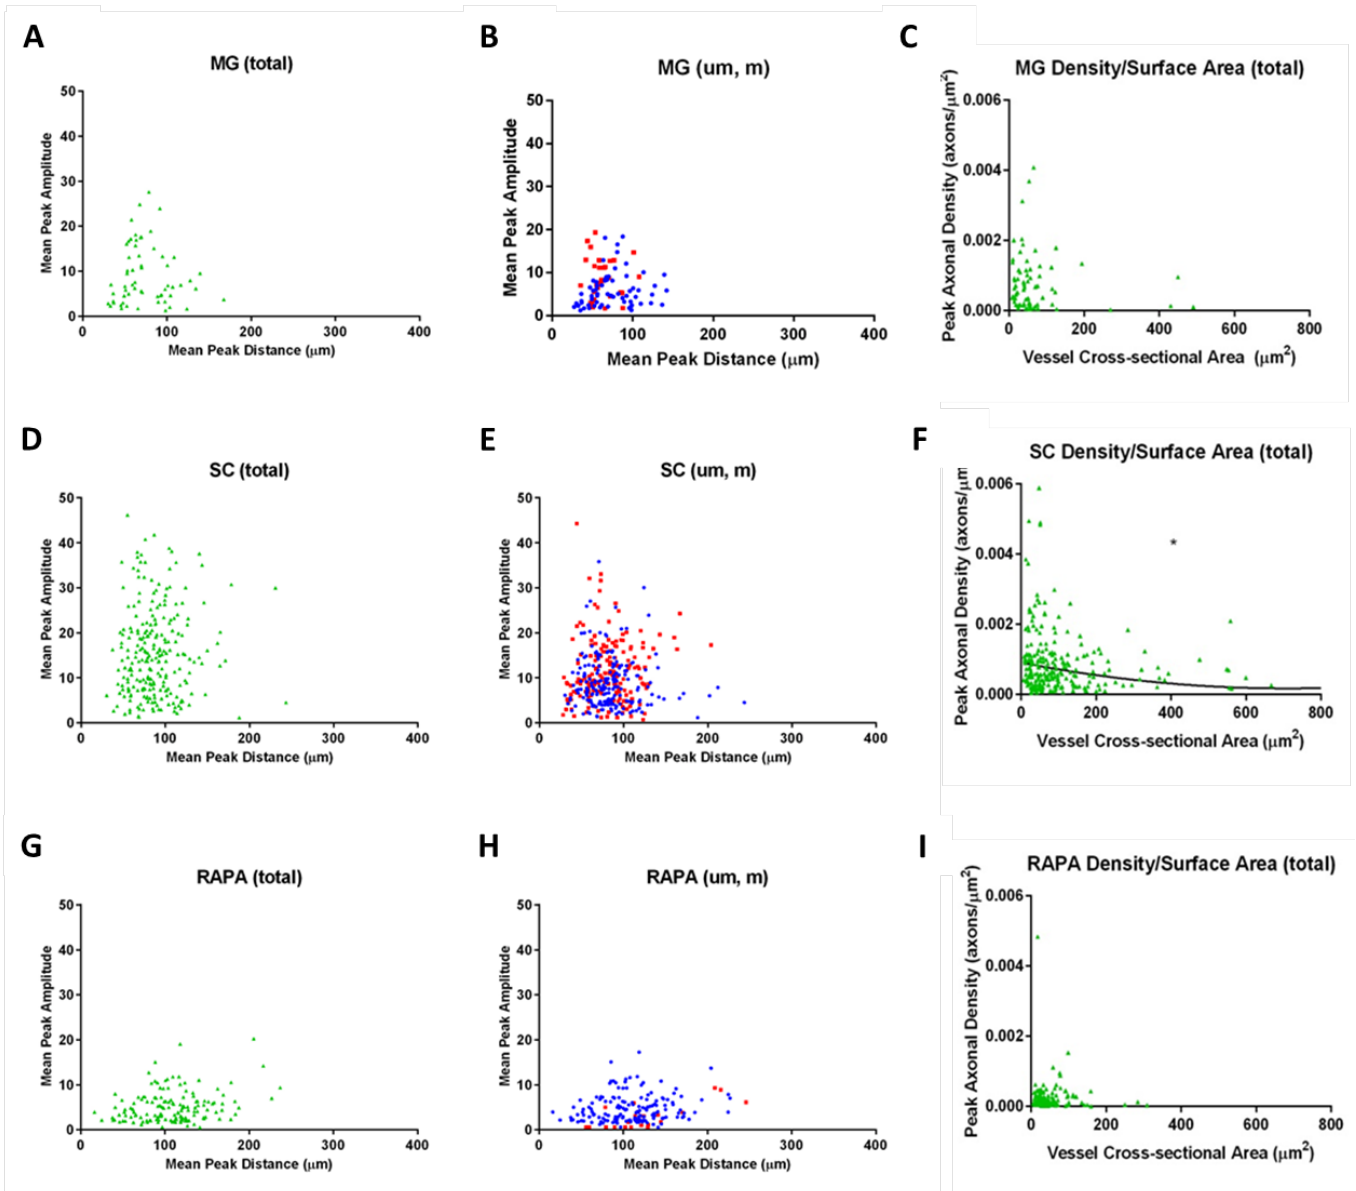

1

2

3

4

5

6

1 **Figure 6: Spatial relationship of axons to blood vessels. (A, B, D, E, G, H)** Mean peak  
2 amplitude versus mean peak distance. (left: total axon count, right: unmyelinated and myelinated  
3 axon count; blue circles=unmyelinated red squares=myelinated. Pattern of the Gaussian  
4 distribution of axons distance and density around blood vessels was measured. The distribution  
5 was concentrated within concentric distance of 200 microns with exclusion from the 25 micron  
6 zone. **(C, F, I)** Peaked Axonal density versus vessel cross-sectional area for total axon count.  
7 Significant negative correlation was observed in the Schwann cell group (SC). Higher axonal  
8 densities were correlated with smaller vessels.

9

10

11

12

13

14

15

16

17

18

19

20

21

22

23

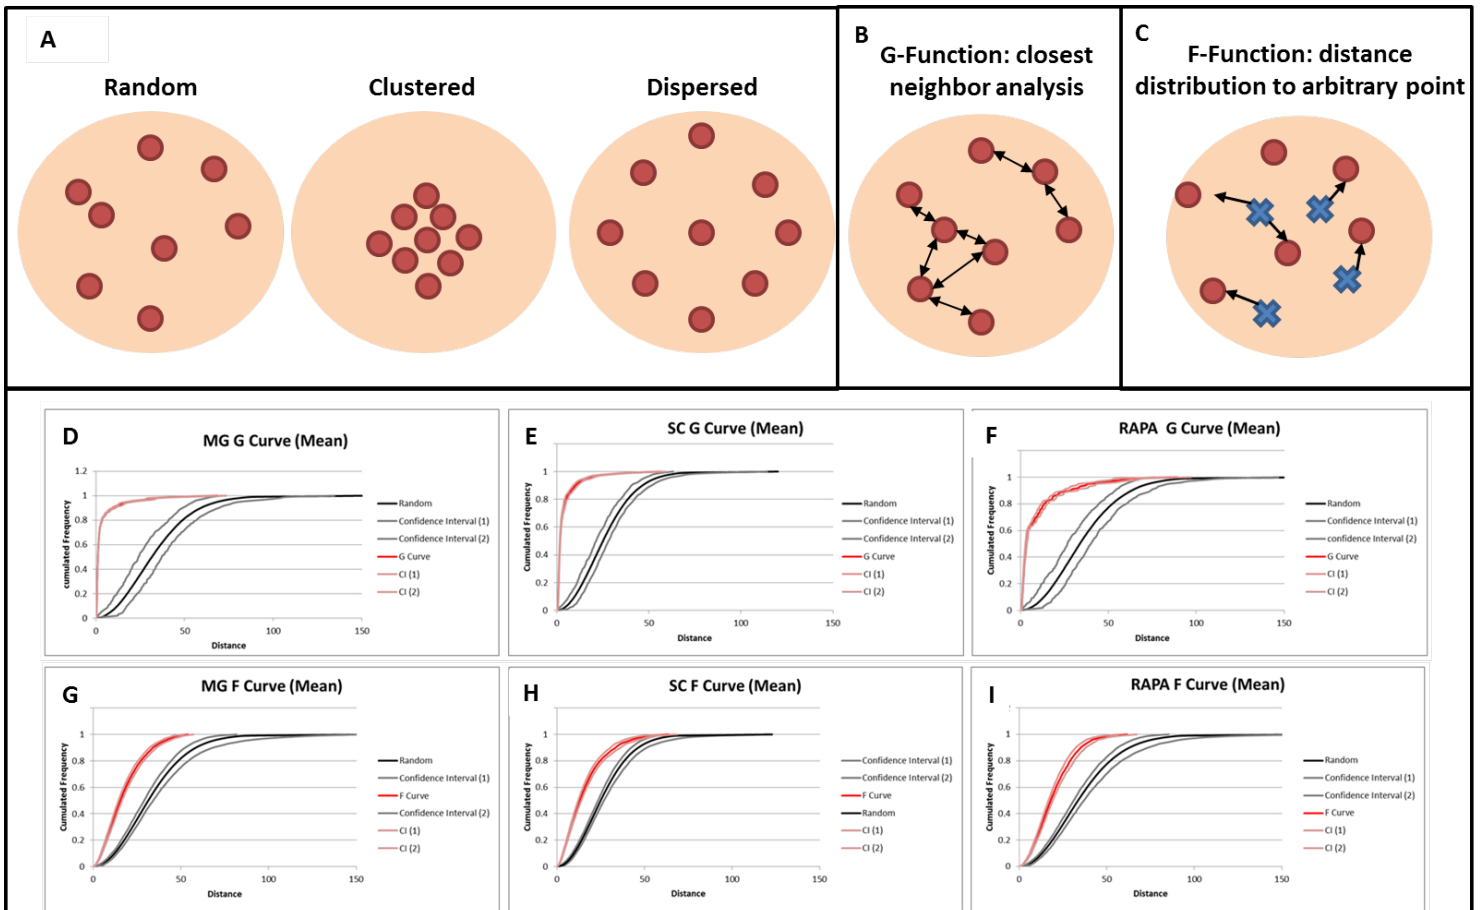

1

2

3

4

5

6

7

8

9

10

11

1 **Figure 7: Analysis of axon clustering.** (A) Axon distributions can be classified as random,  
2 clustered, or dispersed. (B) The closest neighbor analysis (G-function) measures the cumulative  
3 distance distributions between axons. (C) The F-function measures the distance distributions  
4 between an axon and an arbitrary point within the reference space. G-curve demonstrates that  
5 90% of axons in the (D) Matrigel (MG) and (E) Schwann cell (SC) groups are fewer than 10  
6 microns from each other. (F) Whereas those with rapamycin and Schwann cells (RAPA) are 16  
7 microns apart. F-curve indicates a clustered distribution for axons in the (G) MG, (H) SC, and  
8 (I) RAPA groups.

9

10

11
